# Supplementary material for: The Truncated Peptide AtPEP1(9–23) Has the Same Function as AtPEP1(1–23) in Inhibiting Primary Root Growth and Triggering of ROS Burst
Source: MDPI journal article supplement (doi:10.3390/antiox13050549), 2024-04-29
Supplement: s1 [file s1]

Figure S1. The diameter of rosettes. The 5-d-old wild-type plants were transferred onto half-strength MS agar medium with or without 500 nM peptide. Take photos of transferred seedlings daily and measure the diameter of rosettes on day 0 and day 4 after transferred using Image J. The experiment was repeated twice, with 20 seedlings transferred for each treatment in each repetition. "ns" indicated no significant difference, "\*" and "\*\*\*\*" indicated a significant difference at  $p<0.05$  and  $p<0.0001$  level, respectively.
