# Supplementary material for: The Truncated Peptide AtPEP1(9–23) Has the Same Function as AtPEP1(1–23) in Inhibiting Primary Root Growth and Triggering of ROS Burst
Source: Antioxidants (Basel). 2024 Apr 29;13(5):549. doi: 10.3390/antiox13050549 (PMC11117541; doi:10.3390/antiox13050549)
Supplement: Supplementary file 1 [file antioxidants-13-00549-s001.zip]

Archive with 9 entries (9 files):
- Figure legend for Figure S1.pdf
- Figure S1.tif
- Table S1 statistical analysis for Figure 2.xls
- Table S2 statistical analysis for Figure 4.xls
- Table S3 statistical analysis for Figure 5.xls
- Table S4 statistical analysis for Figure 6.xls
- Table S5 statistical analysis for Figure 9.xls
- Table S6 statistical analysis for Figure 10.xls
- Table S7 statistical analysis for Figure S1.xls
