# Supplementary material for: The Truncated Peptide AtPEP1(9–23) Has the Same Function as AtPEP1(1–23) in Inhibiting Primary Root Growth and Triggering of ROS Burst
Source: Antioxidants (Basel). 2024 Apr 29;13(5):549. doi: 10.3390/antiox13050549 (PMC11117541; doi:10.3390/antiox13050549)
Supplement: Supplementary file 1 [file antioxidants-13-00549-s001.zip › Table S1 statistical analysis for Figure 2.xls]

## Sheet: AtPEP1(1-23)
Table Analyzed	AtPEP1(1-23)
Two-way ANOVA	Ordinary
Alpha	0.05
Source of Variation	% of total variation	P value	P value summary	Significant?
Interaction	15.7	<0.0001	****	Yes
Row Factor	57.51	<0.0001	****	Yes
Column Factor	17.74	<0.0001	****	Yes
ANOVA table	SS (Type III)	DF	MS	F (DFn, DFd)	P value
Interaction	28.06	5	5.613	F (5, 172) = 84.37	P<0.0001
Row Factor	102.8	1	102.8	F (1, 172) = 1546	P<0.0001
Column Factor	31.72	5	6.345	F (5, 172) = 95.37	P<0.0001
Residual	11.44	172	0.06653
Difference between row means
Predicted (LS) mean of 0	1.106
Predicted (LS) mean of 4	2.647
Difference between predicted means	-1.541
SE of difference	0.03919
95% CI of difference	-1.618 to -1.464
Data summary
Number of columns (Column Factor)	6
Number of rows (Row Factor)	2
Number of values	184

## Sheet: AtPEP1(5-23)
Table Analyzed	AtPEP1(5-23)
Two-way ANOVA	Ordinary
Alpha	0.05
Source of Variation	% of total variation	P value	P value summary	Significant?
Interaction	17.76	<0.0001	****	Yes
Row Factor	57.34	<0.0001	****	Yes
Column Factor	23.69	<0.0001	****	Yes
ANOVA table	SS (Type III)	DF	MS	F (DFn, DFd)	P value
Interaction	38.7	5	7.74	F (5, 186) = 100.0	P<0.0001
Row Factor	125	1	125	F (1, 186) = 1615	P<0.0001
Column Factor	51.62	5	10.32	F (5, 186) = 133.4	P<0.0001
Residual	14.4	186	0.07739
Difference between row means
Predicted (LS) mean of 0	1.15
Predicted (LS) mean of 4	2.749
Difference between predicted means	-1.599
SE of difference	0.03979
95% CI of difference	-1.677 to -1.520
Data summary
Number of columns (Column Factor)	6
Number of rows (Row Factor)	2
Number of values	198

## Sheet: AtPEP1(7-23)
Table Analyzed	AtPEP1(7-23)
Two-way ANOVA	Ordinary
Alpha	0.05
Source of Variation	% of total variation	P value	P value summary	Significant?
Interaction	30.4	<0.0001	****	Yes
Row Factor	28.97	<0.0001	****	Yes
Column Factor	27.04	<0.0001	****	Yes
ANOVA table	SS (Type III)	DF	MS	F (DFn, DFd)	P value
Interaction	39.79	5	7.958	F (5, 226) = 93.65	P<0.0001
Row Factor	37.92	1	37.92	F (1, 226) = 446.2	P<0.0001
Column Factor	35.39	5	7.078	F (5, 226) = 83.30	P<0.0001
Residual	19.2	226	0.08498
Difference between row means
Predicted (LS) mean of 0	1.15
Predicted (LS) mean of 4	1.949
Difference between predicted means	-0.7985
SE of difference	0.0378
95% CI of difference	-0.8729 to -0.7240
Data summary
Number of columns (Column Factor)	6
Number of rows (Row Factor)	2
Number of values	238

## Sheet: AtPEP1(9-23)
Table Analyzed	AtPEP1(9-23)
Two-way ANOVA	Ordinary
Alpha	0.05
Source of Variation	% of total variation	P value	P value summary	Significant?
Interaction	22.71	<0.0001	****	Yes
Row Factor	40.92	<0.0001	****	Yes
Column Factor	29.01	<0.0001	****	Yes
ANOVA table	SS (Type III)	DF	MS	F (DFn, DFd)	P value
Interaction	47.49	5	9.497	F (5, 224) = 129.2	P<0.0001
Row Factor	85.58	1	85.58	F (1, 224) = 1164	P<0.0001
Column Factor	60.67	5	12.13	F (5, 224) = 165.0	P<0.0001
Residual	16.47	224	0.07353
Difference between row means
Predicted (LS) mean of 0	1.133
Predicted (LS) mean of 4	2.337
Difference between predicted means	-1.205
SE of difference	0.03531
95% CI of difference	-1.274 to -1.135
Data summary
Number of columns (Column Factor)	6
Number of rows (Row Factor)	2
Number of values	236

## Sheet: AtPEP1(11-23)
Table Analyzed	AtPEP1(11-23)
Two-way ANOVA	Ordinary
Alpha	0.05
Source of Variation	% of total variation	P value	P value summary	Significant?
Interaction	5.922	<0.0001	****	Yes
Row Factor	79.61	<0.0001	****	Yes
Column Factor	4.875	<0.0001	****	Yes
ANOVA table	SS (Type III)	DF	MS	F (DFn, DFd)	P value
Interaction	8.637	5	1.727	F (5, 166) = 45.70	P<0.0001
Row Factor	116.1	1	116.1	F (1, 166) = 3071	P<0.0001
Column Factor	7.109	5	1.422	F (5, 166) = 37.61	P<0.0001
Residual	6.275	166	0.0378
Difference between row means
Predicted (LS) mean of 0	1.152
Predicted (LS) mean of 4	2.942
Difference between predicted means	-1.79
SE of difference	0.0323
95% CI of difference	-1.854 to -1.726
Data summary
Number of columns (Column Factor)	6
Number of rows (Row Factor)	2
Number of values	178

## Sheet: AtPEP1(13-23)
Table Analyzed	AtPEP1(13-23)
Two-way ANOVA	Ordinary
Alpha	0.05
Source of Variation	% of total variation	P value	P value summary	Significant?
Interaction	1.312	<0.0001	****	Yes
Row Factor	82.18	<0.0001	****	Yes
Column Factor	1.511	<0.0001	****	Yes
ANOVA table	SS (Type III)	DF	MS	F (DFn, DFd)	P value
Interaction	3.279	5	0.6559	F (5, 158) = 12.86	P<0.0001
Row Factor	205.4	1	205.4	F (1, 158) = 4028	P<0.0001
Column Factor	3.777	5	0.7553	F (5, 158) = 14.81	P<0.0001
Residual	8.056	158	0.05099
Difference between row means
Predicted (LS) mean of 0	1.128
Predicted (LS) mean of 4	3.517
Difference between predicted means	-2.388
SE of difference	0.03763
95% CI of difference	-2.462 to -2.314
Data summary
Number of columns (Column Factor)	6
Number of rows (Row Factor)	2
Number of values	170

## Sheet: AtPEP1(9-22)
Table Analyzed	AtPEP1(9-22)
Two-way ANOVA	Ordinary
Alpha	0.05
Source of Variation	% of total variation	P value	P value summary	Significant?
Interaction	0.3059	0.0007	***	Yes
Row Factor	95.53	<0.0001	****	Yes
Column Factor	0.427	<0.0001	****	Yes
ANOVA table	SS (Type III)	DF	MS	F (DFn, DFd)	P value
Interaction	1.048	5	0.2096	F (5, 194) = 4.473	P=0.0007
Row Factor	327.3	1	327.3	F (1, 194) = 6984	P<0.0001
Column Factor	1.463	5	0.2926	F (5, 194) = 6.243	P<0.0001
Residual	9.092	194	0.04686
Difference between row means
Predicted (LS) mean of 0	1.056
Predicted (LS) mean of 4	3.587
Difference between predicted means	-2.531
SE of difference	0.03029
95% CI of difference	-2.591 to -2.471
Data summary
Number of columns (Column Factor)	6
Number of rows (Row Factor)	2
Number of values	206
