# Supplementary material for: The Truncated Peptide AtPEP1(9–23) Has the Same Function as AtPEP1(1–23) in Inhibiting Primary Root Growth and Triggering of ROS Burst
Source: Antioxidants (Basel). 2024 Apr 29;13(5):549. doi: 10.3390/antiox13050549 (PMC11117541; doi:10.3390/antiox13050549)
Supplement: Supplementary file 1 [file antioxidants-13-00549-s001.zip › Table S2 statistical analysis for Figure 4.xls]

## Sheet: dr5
Table Analyzed	dr5
Two-way ANOVA	Ordinary
Alpha	0.05
Source of Variation	% of total variation	P value	P value summary	Significant?
Interaction	24.43	<0.0001	****	Yes
Row Factor	41.17	<0.0001	****	Yes
Column Factor	29.51	<0.0001	****	Yes
ANOVA table	SS (Type III)	DF	MS	F (DFn, DFd)	P value
Interaction	67.79	6	11.3	F (6, 262) = 170.9	P<0.0001
Row Factor	114.2	1	114.2	F (1, 262) = 1728	P<0.0001
Column Factor	81.89	6	13.65	F (6, 262) = 206.5	P<0.0001
Residual	17.32	262	0.0661
Difference between row means
Predicted (LS) mean of 0	1.098
Predicted (LS) mean of 4d	2.386
Difference between predicted means	-1.288
SE of difference	0.03097
95% CI of difference	-1.349 to -1.227
Data summary
Number of columns (Column Factor)	7
Number of rows (Row Factor)	2
Number of values	276

## Sheet: wox5
Table Analyzed	wox5
Two-way ANOVA	Ordinary
Alpha	0.05
Source of Variation	% of total variation	P value	P value summary	Significant?
Interaction	25.95	<0.0001	****	Yes
Row Factor	36.55	<0.0001	****	Yes
Column Factor	25.66	<0.0001	****	Yes
ANOVA table	SS (Type III)	DF	MS	F (DFn, DFd)	P value
Interaction	67.45	6	11.24	F (6, 256) = 230.7	P<0.0001
Row Factor	95.01	1	95.01	F (1, 256) = 1950	P<0.0001
Column Factor	66.7	6	11.12	F (6, 256) = 228.2	P<0.0001
Residual	12.47	256	0.04872
Difference between row means
Predicted (LS) mean of 0	1.07
Predicted (LS) mean of 4 d	2.276
Difference between predicted means	-1.206
SE of difference	0.02731
95% CI of difference	-1.260 to -1.152
Data summary
Number of columns (Column Factor)	7
Number of rows (Row Factor)	2
Number of values	270
