# Supplementary material for: The Truncated Peptide AtPEP1(9–23) Has the Same Function as AtPEP1(1–23) in Inhibiting Primary Root Growth and Triggering of ROS Burst
Source: Antioxidants (Basel). 2024 Apr 29;13(5):549. doi: 10.3390/antiox13050549 (PMC11117541; doi:10.3390/antiox13050549)
Supplement: Supplementary file 1 [file antioxidants-13-00549-s001.zip › Table S3 statistical analysis for Figure 5.xls]

## Sheet: dr5
Table Analyzed	dr5
Data sets analyzed	A-H
ANOVA summary
F	30.21
P value	<0.0001
P value summary	****
Significant diff. among means (P < 0.05)?	Yes
R squared	0.664
Brown-Forsythe test
F (DFn, DFd)
P value
P value summary
Are SDs significantly different (P < 0.05)?
Bartlett's test
Bartlett's statistic (corrected)	13.73
P value	0.0562
P value summary	ns
Are SDs significantly different (P < 0.05)?	No
ANOVA table	SS	DF	MS	F (DFn, DFd)	P value
Treatment (between columns)	58941	7	8420	F (7, 107) = 30.21	P<0.0001
Residual (within columns)	29824	107	278.7
Total	88765	114
Data summary
Number of treatments (columns)	8
Number of values (total)	115

## Sheet: wox5
Table Analyzed	wox5
Two-way ANOVA	Ordinary
Alpha	0.05
Source of Variation	% of total variation	P value	P value summary	Significant?
Interaction	0.8078	0.278	ns	No
Row Factor	73.74	<0.0001	****	Yes
Column Factor	2.252	0.0016	**	Yes
ANOVA table	SS (Type III)	DF	MS	F (DFn, DFd)	P value
Interaction	67.26	7	9.608	F (7, 166) = 1.251	P=0.2780
Row Factor	6140	1	6140	F (1, 166) = 799.3	P<0.0001
Column Factor	187.5	7	26.79	F (7, 166) = 3.488	P=0.0016
Residual	1275	166	7.682
Difference between row means
Predicted (LS) mean of Row 1	20.71
Predicted (LS) mean of Row 2	8.266
Difference between predicted means	12.44
SE of difference	0.4401
95% CI of difference	11.57 to 13.31
Data summary
Number of columns (Column Factor)	8
Number of rows (Row Factor)	2
Number of values	182
