# Supplementary material for: The Truncated Peptide AtPEP1(9–23) Has the Same Function as AtPEP1(1–23) in Inhibiting Primary Root Growth and Triggering of ROS Burst
Source: Antioxidants (Basel). 2024 Apr 29;13(5):549. doi: 10.3390/antiox13050549 (PMC11117541; doi:10.3390/antiox13050549)
Supplement: Supplementary file 1 [file antioxidants-13-00549-s001.zip › Table S4 statistical analysis for Figure 6.xls]

## Sheet: pepr1and pepr2 mutant
Table Analyzed	pepr1/2
Two-way ANOVA	Ordinary
Alpha	0.05
Source of Variation	% of total variation	P value	P value summary	Significant?
Interaction	0.2369	0.0266	*	Yes
Row Factor	87.47	<0.0001	****	Yes
Column Factor	0.4993	<0.0001	****	Yes
ANOVA table	SS (Type III)	DF	MS	F (DFn, DFd)	P value
Interaction	0.5494	7	0.07848	F (7, 140) = 2.352	P=0.0266
Row Factor	202.8	1	202.8	F (1, 140) = 6078	P<0.0001
Column Factor	1.158	7	0.1654	F (7, 140) = 4.956	P<0.0001
Residual	4.672	140	0.03337
Difference between row means
Predicted (LS) mean of Row 1	1.001
Predicted (LS) mean of Row 2	3.537
Difference between predicted means	-2.536
SE of difference	0.03253
95% CI of difference	-2.600 to -2.472
Data summary
Number of columns (Column Factor)	8
Number of rows (Row Factor)	2
Number of values	156
