# Supplementary material for: The Truncated Peptide AtPEP1(9–23) Has the Same Function as AtPEP1(1–23) in Inhibiting Primary Root Growth and Triggering of ROS Burst
Source: Antioxidants (Basel). 2024 Apr 29;13(5):549. doi: 10.3390/antiox13050549 (PMC11117541; doi:10.3390/antiox13050549)
Supplement: Supplementary file 1 [file antioxidants-13-00549-s001.zip › Table S5 statistical analysis for Figure 9.xls]

## Sheet: Sheet1
Table Analyzed	pep1
Data sets analyzed	A-H
ANOVA summary
F	141.3
P value	<0.0001
P value summary	****
Significant diff. among means (P < 0.05)?	Yes
R squared	0.9802
Brown-Forsythe test
F (DFn, DFd)
P value
P value summary
Are SDs significantly different (P < 0.05)?
Bartlett's test
Bartlett's statistic (corrected)
P value
P value summary
Are SDs significantly different (P < 0.05)?
ANOVA table	SS	DF	MS	F (DFn, DFd)	P value
Treatment (between columns)	4597970473	7	656852925	F (7, 20) = 141.3	P<0.0001
Residual (within columns)	93002478	20	4650124
Total	4690972951	27
Data summary
Number of treatments (columns)	8
Number of values (total)	28

## Sheet: Sheet2
Table Analyzed	pep1(5-23)
Data sets analyzed	A-H
ANOVA summary
F	24.12
P value	<0.0001
P value summary	****
Significant diff. among means (P < 0.05)?	Yes
R squared	0.9037
Brown-Forsythe test
F (DFn, DFd)
P value
P value summary
Are SDs significantly different (P < 0.05)?
Bartlett's test
Bartlett's statistic (corrected)
P value
P value summary
Are SDs significantly different (P < 0.05)?
ANOVA table	SS	DF	MS	F (DFn, DFd)	P value
Treatment (between columns)	3570078150	7	510011164	F (7, 18) = 24.12	P<0.0001
Residual (within columns)	380578104	18	21143228
Total	3950656254	25
Data summary
Number of treatments (columns)	8
Number of values (total)	26

## Sheet: Sheet3
Table Analyzed	pep1(7-23)
Data sets analyzed	A-H
ANOVA summary
F	36.35
P value	<0.0001
P value summary	****
Significant diff. among means (P < 0.05)?	Yes
R squared	0.9408
Brown-Forsythe test
F (DFn, DFd)
P value
P value summary
Are SDs significantly different (P < 0.05)?
Bartlett's test
Bartlett's statistic (corrected)
P value
P value summary
Are SDs significantly different (P < 0.05)?
ANOVA table	SS	DF	MS	F (DFn, DFd)	P value
Treatment (between columns)	5506228737	7	786604105	F (7, 16) = 36.35	P<0.0001
Residual (within columns)	346197489	16	21637343
Total	5852426226	23
Data summary
Number of treatments (columns)	8
Number of values (total)	24

## Sheet: Sheet4
Table Analyzed	pep1(9-23)
Data sets analyzed	A-H
ANOVA summary
F	45.26
P value	<0.0001
P value summary	****
Significant diff. among means (P < 0.05)?	Yes
R squared	0.9491
Brown-Forsythe test
F (DFn, DFd)
P value
P value summary
Are SDs significantly different (P < 0.05)?
Bartlett's test
Bartlett's statistic (corrected)
P value
P value summary
Are SDs significantly different (P < 0.05)?
ANOVA table	SS	DF	MS	F (DFn, DFd)	P value
Treatment (between columns)	2585106642	7	369300949	F (7, 17) = 45.26	P<0.0001
Residual (within columns)	138723768	17	8160222
Total	2723830410	24
Data summary
Number of treatments (columns)	8
Number of values (total)	25

## Sheet: Sheet5
Table Analyzed	pep1(11-23)
Data sets analyzed	A-H
ANOVA summary
F	36.05
P value	<0.0001
P value summary	****
Significant diff. among means (P < 0.05)?	Yes
R squared	0.9266
Brown-Forsythe test
F (DFn, DFd)
P value
P value summary
Are SDs significantly different (P < 0.05)?
Bartlett's test
Bartlett's statistic (corrected)
P value
P value summary
Are SDs significantly different (P < 0.05)?
ANOVA table	SS	DF	MS	F (DFn, DFd)	P value
Treatment (between columns)	7278207633	7	1039743948	F (7, 20) = 36.05	P<0.0001
Residual (within columns)	576778766	20	28838938
Total	7854986399	27
Data summary
Number of treatments (columns)	8
Number of values (total)	28

## Sheet: Sheet6
Table Analyzed	pep1(13-23)
Data sets analyzed	A-H
ANOVA summary
F	23.47
P value	<0.0001
P value summary	****
Significant diff. among means (P < 0.05)?	Yes
R squared	0.8964
Brown-Forsythe test
F (DFn, DFd)
P value
P value summary
Are SDs significantly different (P < 0.05)?
Bartlett's test
Bartlett's statistic (corrected)
P value
P value summary
Are SDs significantly different (P < 0.05)?
ANOVA table	SS	DF	MS	F (DFn, DFd)	P value
Treatment (between columns)	956454617	7	136636374	F (7, 19) = 23.47	P<0.0001
Residual (within columns)	110592153	19	5820640
Total	1067046770	26
Data summary
Number of treatments (columns)	8
Number of values (total)	27

## Sheet: Sheet7
Table Analyzed	pep1(9-22)
Data sets analyzed	A-H
ANOVA summary
F	41.59
P value	<0.0001
P value summary	****
Significant diff. among means (P < 0.05)?	Yes
R squared	0.9448
Brown-Forsythe test
F (DFn, DFd)
P value
P value summary
Are SDs significantly different (P < 0.05)?
Bartlett's test
Bartlett's statistic (corrected)
P value
P value summary
Are SDs significantly different (P < 0.05)?
ANOVA table	SS	DF	MS	F (DFn, DFd)	P value
Treatment (between columns)	4280070940	7	611438706	F (7, 17) = 41.59	P<0.0001
Residual (within columns)	249945760	17	14702692
Total	4530016700	24
Data summary
Number of treatments (columns)	8
Number of values (total)	25
