# Supplementary material for: The Truncated Peptide AtPEP1(9–23) Has the Same Function as AtPEP1(1–23) in Inhibiting Primary Root Growth and Triggering of ROS Burst
Source: Antioxidants (Basel). 2024 Apr 29;13(5):549. doi: 10.3390/antiox13050549 (PMC11117541; doi:10.3390/antiox13050549)
Supplement: Supplementary file 1 [file antioxidants-13-00549-s001.zip › Table S6 statistical analysis for Figure 10.xls]

## Sheet: Sheet1
Table Analyzed	*pepr1/2 500
Data sets analyzed	A-H
ANOVA summary
F	0.9482
P value	0.4943
P value summary	ns
Significant diff. among means (P < 0.05)?	No
R squared	0.2589
Brown-Forsythe test
F (DFn, DFd)
P value
P value summary
Are SDs significantly different (P < 0.05)?
Bartlett's test
Bartlett's statistic (corrected)
P value
P value summary
Are SDs significantly different (P < 0.05)?
ANOVA table	SS	DF	MS	F (DFn, DFd)	P value
Treatment (between columns)	12401380	7	1771626	F (7, 19) = 0.9482	P=0.4943
Residual (within columns)	35501274	19	1868488
Total	47902654	26
Data summary
Number of treatments (columns)	8
Number of values (total)	27

## Sheet: Sheet2
Table Analyzed	*pepr1/2 1000
Data sets analyzed	A-H
ANOVA summary
F	1.39
P value	0.2754
P value summary	ns
Significant diff. among means (P < 0.05)?	No
R squared	0.3782
Brown-Forsythe test
F (DFn, DFd)
P value
P value summary
Are SDs significantly different (P < 0.05)?
Bartlett's test
Bartlett's statistic (corrected)
P value
P value summary
Are SDs significantly different (P < 0.05)?
ANOVA table	SS	DF	MS	F (DFn, DFd)	P value
Treatment (between columns)	40200717	7	5742960	F (7, 16) = 1.390	P=0.2754
Residual (within columns)	66098947	16	4131184
Total	106299664	23
Data summary
Number of treatments (columns)	8
Number of values (total)	24

## Sheet: Sheet3
Table Analyzed	*pepr1/2 2000
Data sets analyzed	A-H
ANOVA summary
F	4.627
P value	0.0032
P value summary	**
Significant diff. among means (P < 0.05)?	Yes
R squared	0.6182
Brown-Forsythe test
F (DFn, DFd)
P value
P value summary
Are SDs significantly different (P < 0.05)?
Bartlett's test
Bartlett's statistic (corrected)
P value
P value summary
Are SDs significantly different (P < 0.05)?
ANOVA table	SS	DF	MS	F (DFn, DFd)	P value
Treatment (between columns)	23571806	7	3367401	F (7, 20) = 4.627	P=0.0032
Residual (within columns)	14555824	20	727791
Total	38127630	27
Data summary
Number of treatments (columns)	8
Number of values (total)	28

## Sheet: Sheet4
Table Analyzed	*col-0 500
Data sets analyzed	A-H
ANOVA summary
F	8.811
P value	<0.0001
P value summary	****
Significant diff. among means (P < 0.05)?	Yes
R squared	0.746
Brown-Forsythe test
F (DFn, DFd)
P value
P value summary
Are SDs significantly different (P < 0.05)?
Bartlett's test
Bartlett's statistic (corrected)
P value
P value summary
Are SDs significantly different (P < 0.05)?
ANOVA table	SS	DF	MS	F (DFn, DFd)	P value
Treatment (between columns)	9961980330	7	1423140047	F (7, 21) = 8.811	P<0.0001
Residual (within columns)	3391944313	21	161521158
Total	13353924643	28
Data summary
Number of treatments (columns)	8
Number of values (total)	29

## Sheet: Sheet5
Table Analyzed	*col-0 1000
Data sets analyzed	A-H
ANOVA summary
F	12.43
P value	<0.0001
P value summary	****
Significant diff. among means (P < 0.05)?	Yes
R squared	0.8056
Brown-Forsythe test
F (DFn, DFd)
P value
P value summary
Are SDs significantly different (P < 0.05)?
Bartlett's test
Bartlett's statistic (corrected)
P value
P value summary
Are SDs significantly different (P < 0.05)?
ANOVA table	SS	DF	MS	F (DFn, DFd)	P value
Treatment (between columns)	8011501660	7	1144500237	F (7, 21) = 12.43	P<0.0001
Residual (within columns)	1933439727	21	92068558
Total	9944941388	28
Data summary
Number of treatments (columns)	8
Number of values (total)	29

## Sheet: Sheet6
Table Analyzed	*col-0 2000
Data sets analyzed	A-H
ANOVA summary
F	33.64
P value	<0.0001
P value summary	****
Significant diff. among means (P < 0.05)?	Yes
R squared	0.929
Brown-Forsythe test
F (DFn, DFd)
P value
P value summary
Are SDs significantly different (P < 0.05)?
Bartlett's test
Bartlett's statistic (corrected)
P value
P value summary
Are SDs significantly different (P < 0.05)?
ANOVA table	SS	DF	MS	F (DFn, DFd)	P value
Treatment (between columns)	9447006709	7	1349572387	F (7, 18) = 33.64	P<0.0001
Residual (within columns)	722157547	18	40119864
Total	10169164256	25
Data summary
Number of treatments (columns)	8
Number of values (total)	26
