# Supplementary material for: The Truncated Peptide AtPEP1(9–23) Has the Same Function as AtPEP1(1–23) in Inhibiting Primary Root Growth and Triggering of ROS Burst
Source: Antioxidants (Basel). 2024 Apr 29;13(5):549. doi: 10.3390/antiox13050549 (PMC11117541; doi:10.3390/antiox13050549)
Supplement: Supplementary file 1 [file antioxidants-13-00549-s001.zip › Table S7 statistical analysis for Figure S1.xls]

## Sheet: AtPEP1(1-23)
Table Analyzed	AtPEP1(1-23)
Two-way ANOVA	Ordinary
Alpha	0.05
Source of Variation	% of total variation	P value	P value summary	Significant?
Interaction	0.7779	0.0312	*	Yes
Row Factor	86.39	<0.0001	****	Yes
Column Factor	0.3679	0.1351	ns	No
ANOVA table	SS (Type III)	DF	MS	F (DFn, DFd)	P value
Interaction	0.01789	1	0.01789	F (1, 75) = 4.823	P=0.0312
Row Factor	1.987	1	1.987	F (1, 75) = 535.6	P<0.0001
Column Factor	0.008462	1	0.008462	F (1, 75) = 2.281	P=0.1351
Residual	0.2782	75	0.003709
Difference between column means
Predicted (LS) mean of mock	0.422
Predicted (LS) mean of AtPEP1(1-23)	0.4013
Difference between predicted means	0.0207
SE of difference	0.01371
95% CI of difference	-0.006603 to 0.04801
Difference between row means
Predicted (LS) mean of Day 0	0.253
Predicted (LS) mean of Day 4	0.5702
Difference between predicted means	-0.3172
SE of difference	0.01371
95% CI of difference	-0.3446 to -0.2899
Interaction CI
Mean diff, A1 - B1	-0.0094
Mean diff, A2 - B2	0.05081
(A1 -B1) - (A2 - B2)	-0.06021
95% CI of difference	-0.1148 to -0.005594
(B1 - A1) - (B2 - A2)	0.06021
95% CI of difference	0.005594 to 0.1148
Data summary
Number of columns (Column Factor)	2
Number of rows (Row Factor)	2
Number of values	79

## Sheet: AtPEP1(5-23)
Table Analyzed	AtPEP1(5-23)
Two-way ANOVA	Ordinary
Alpha	0.05
Source of Variation	% of total variation	P value	P value summary	Significant?
Interaction	1.854	0.0001	***	Yes
Row Factor	87.13	<0.0001	****	Yes
Column Factor	2.501	<0.0001	****	Yes
ANOVA table	SS (Type III)	DF	MS	F (DFn, DFd)	P value
Interaction	0.05425	1	0.05425	F (1, 74) = 16.32	P=0.0001
Row Factor	2.549	1	2.549	F (1, 74) = 767.0	P<0.0001
Column Factor	0.0732	1	0.0732	F (1, 74) = 22.02	P<0.0001
Residual	0.246	74	0.003324
Difference between column means
Predicted (LS) mean of mock	0.474
Predicted (LS) mean of AtPEP1(5-23)	0.4127
Difference between predicted means	0.06129
SE of difference	0.01306
95% CI of difference	0.03526 to 0.08731
Difference between row means
Predicted (LS) mean of Day 0	0.2625
Predicted (LS) mean of Day 4	0.6242
Difference between predicted means	-0.3617
SE of difference	0.01306
95% CI of difference	-0.3877 to -0.3357
Interaction CI
Mean diff, A1 - B1	0.008526
Mean diff, A2 - B2	0.1141
(A1 -B1) - (A2 - B2)	-0.1055
95% CI of difference	-0.1576 to -0.05348
(B1 - A1) - (B2 - A2)	0.1055
95% CI of difference	0.05348 to 0.1576
Data summary
Number of columns (Column Factor)	2
Number of rows (Row Factor)	2
Number of values	78

## Sheet: AtPEP1(7-23)
Table Analyzed	AtPEP1(7-23)
Two-way ANOVA	Ordinary
Alpha	0.05
Source of Variation	% of total variation	P value	P value summary	Significant?
Interaction	6.634	<0.0001	****	Yes
Row Factor	71.79	<0.0001	****	Yes
Column Factor	9.317	<0.0001	****	Yes
ANOVA table	SS	DF	MS	F (DFn, DFd)	P value
Interaction	0.1667	1	0.1667	F (1, 76) = 41.12	P<0.0001
Row Factor	1.804	1	1.804	F (1, 76) = 445.0	P<0.0001
Column Factor	0.2341	1	0.2341	F (1, 76) = 57.75	P<0.0001
Residual	0.3081	76	0.004054
Difference between column means
Mean of mock	0.4619
Mean of AtPEP1(7-23)	0.3537
Difference between means	0.1082
SE of difference	0.01424
95% CI of difference	0.07984 to 0.1366
Difference between row means
Mean of Day 0	0.2577
Mean of Day 4	0.558
Difference between means	-0.3004
SE of difference	0.01424
95% CI of difference	-0.3287 to -0.2720
Interaction CI
Mean diff, A1 - B1	0.0169
Mean diff, A2 - B2	0.1995
(A1 -B1) - (A2 - B2)	-0.1826
95% CI of difference	-0.2393 to -0.1259
(B1 - A1) - (B2 - A2)	0.1826
95% CI of difference	0.1259 to 0.2393
Data summary
Number of columns (Column Factor)	2
Number of rows (Row Factor)	2
Number of values	80

## Sheet: AtPEP1(9-23)
Table Analyzed	AtPEP1(9-23)
Two-way ANOVA	Ordinary
Alpha	0.05
Source of Variation	% of total variation	P value	P value summary	Significant?
Interaction	2.87	<0.0001	****	Yes
Row Factor	87.04	<0.0001	****	Yes
Column Factor	1.982	0.0001	***	Yes
ANOVA table	SS (Type III)	DF	MS	F (DFn, DFd)	P value
Interaction	0.06435	1	0.06435	F (1, 75) = 24.24	P<0.0001
Row Factor	1.952	1	1.952	F (1, 75) = 735.2	P<0.0001
Column Factor	0.04443	1	0.04443	F (1, 75) = 16.74	P=0.0001
Residual	0.1991	75	0.002655
Difference between column means
Predicted (LS) mean of mock	0.45
Predicted (LS) mean of AtPEP1(9-23)	0.4025
Difference between predicted means	0.04744
SE of difference	0.0116
95% CI of difference	0.02434 to 0.07055
Difference between row means
Predicted (LS) mean of Day 0	0.269
Predicted (LS) mean of Day 4	0.5835
Difference between predicted means	-0.3144
SE of difference	0.0116
95% CI of difference	-0.3375 to -0.2913
Interaction CI
Mean diff, A1 - B1	-0.00965
Mean diff, A2 - B2	0.1045
(A1 -B1) - (A2 - B2)	-0.1142
95% CI of difference	-0.1604 to -0.06798
(B1 - A1) - (B2 - A2)	0.1142
95% CI of difference	0.06798 to 0.1604
Data summary
Number of columns (Column Factor)	2
Number of rows (Row Factor)	2
Number of values	79

## Sheet: AtPEP1(11-23)
Table Analyzed	AtPEP1(11-23)
Two-way ANOVA	Ordinary
Alpha	0.05
Source of Variation	% of total variation	P value	P value summary	Significant?
Interaction	3.033	0.0002	***	Yes
Row Factor	73.85	<0.0001	****	Yes
Column Factor	8.144	<0.0001	****	Yes
ANOVA table	SS	DF	MS	F (DFn, DFd)	P value
Interaction	0.04802	1	0.04802	F (1, 76) = 15.39	P=0.0002
Row Factor	1.169	1	1.169	F (1, 76) = 374.8	P<0.0001
Column Factor	0.129	1	0.129	F (1, 76) = 41.34	P<0.0001
Residual	0.2371	76	0.00312
Difference between column means
Mean of mock	0.421
Mean of AtPEP1(11-23)	0.3407
Difference between means	0.0803
SE of difference	0.01249
95% CI of difference	0.05542 to 0.1052
Difference between row means
Mean of Day 0	0.26
Mean of Day 4	0.5018
Difference between means	-0.2418
SE of difference	0.01249
95% CI of difference	-0.2667 to -0.2169
Interaction CI
Mean diff, A1 - B1	0.0313
Mean diff, A2 - B2	0.1293
(A1 -B1) - (A2 - B2)	-0.098
95% CI of difference	-0.1478 to -0.04825
(B1 - A1) - (B2 - A2)	0.098
95% CI of difference	0.04825 to 0.1478
Data summary
Number of columns (Column Factor)	2
Number of rows (Row Factor)	2
Number of values	80

## Sheet: AtPEP1(13-23)
Table Analyzed	AtPEP1(13-23)
Two-way ANOVA	Ordinary
Alpha	0.05
Source of Variation	% of total variation	P value	P value summary	Significant?
Interaction	0.05889	0.5748	ns	No
Row Factor	85	<0.0001	****	Yes
Column Factor	0.7447	0.0487	*	Yes
ANOVA table	SS (Type III)	DF	MS	F (DFn, DFd)	P value
Interaction	0.00119	1	0.00119	F (1, 75) = 0.3175	P=0.5748
Row Factor	1.718	1	1.718	F (1, 75) = 458.3	P<0.0001
Column Factor	0.01505	1	0.01505	F (1, 75) = 4.015	P=0.0487
Residual	0.2812	75	0.00375
Difference between column means
Predicted (LS) mean of mock	0.4344
Predicted (LS) mean of AtPEP1(13-23)	0.4067
Difference between predicted means	0.02762
SE of difference	0.01378
95% CI of difference	0.0001602 to 0.05507
Difference between row means
Predicted (LS) mean of Day 0	0.273
Predicted (LS) mean of Day 4	0.5681
Difference between predicted means	-0.295
SE of difference	0.01378
95% CI of difference	-0.3225 to -0.2676
Interaction CI
Mean diff, A1 - B1	0.01985
Mean diff, A2 - B2	0.03538
(A1 -B1) - (A2 - B2)	-0.01553
95% CI of difference	-0.07044 to 0.03938
(B1 - A1) - (B2 - A2)	0.01553
95% CI of difference	-0.03938 to 0.07044
Data summary
Number of columns (Column Factor)	2
Number of rows (Row Factor)	2
Number of values	79

## Sheet: AtPEP1(9-22)
Table Analyzed	AtPEP1(9-22)
Two-way ANOVA	Ordinary
Alpha	0.05
Source of Variation	% of total variation	P value	P value summary	Significant?
Interaction	0.2546	0.1849	ns	No
Row Factor	89.18	<0.0001	****	Yes
Column Factor	0.05782	0.5256	ns	No
ANOVA table	SS (Type III)	DF	MS	F (DFn, DFd)	P value
Interaction	0.004903	1	0.004903	F (1, 75) = 1.791	P=0.1849
Row Factor	1.717	1	1.717	F (1, 75) = 627.1	P<0.0001
Column Factor	0.001114	1	0.001114	F (1, 75) = 0.4066	P=0.5256
Residual	0.2054	75	0.002738
Difference between column means
Predicted (LS) mean of mock	0.3776
Predicted (LS) mean of AtPEP1(9-22)	0.3851
Difference between predicted means	-0.007511
SE of difference	0.01178
95% CI of difference	-0.03097 to 0.01595
Difference between row means
Predicted (LS) mean of Day 0	0.2338
Predicted (LS) mean of Day 4	0.5288
Difference between predicted means	-0.295
SE of difference	0.01178
95% CI of difference	-0.3184 to -0.2715
Interaction CI
Mean diff, A1 - B1	0.00825
Mean diff, A2 - B2	-0.02327
(A1 -B1) - (A2 - B2)	0.03152
95% CI of difference	-0.01541 to 0.07845
(B1 - A1) - (B2 - A2)	-0.03152
95% CI of difference	-0.07845 to 0.01541
Data summary
Number of columns (Column Factor)	2
Number of rows (Row Factor)	2
Number of values	79
